# Supplementary material
Source: MDPI journal article supplement (https://www.mdpi.com/1996-1073/14/20/6630)
Supplement: s1 [file s1]

## Supplementary Information

# **Residential solar hot water adoption behaviour: A review of economic and technical predictors and their correlation with the adoption decision**

**Sara Ghaboulian Zare <sup>a</sup>, Reza Hafezi <sup>b</sup>, Mohammad Alipour <sup>c, d, \*</sup>, Reza Parsaei Tabar <sup>e</sup>, Rodney A. Stewart <sup>c, d</sup>**

<sup>a</sup> *Industrial Engineering department, Sadjad University, Mashhad, Iran.*

<sup>b</sup> *Science and Technology Futures Studies, National Research Institute for Science Policy, Tehran, Iran.*

<sup>c</sup> *School of Engineering and Built Environment, Griffith University, Southport, QLD 4222 Australia.*

<sup>d</sup> *Cities Research Institute, Griffith University, Southport, QLD 4222 Australia.*

<sup>e</sup> *Faculty of Economics and Administrative Sciences, Ferdowsi University, Mashhad, Iran.*

---

## **Contents**

|                                                       |    |
|-------------------------------------------------------|----|
| 1. Search keywords.....                               | 1  |
| 2. Four-phase assessment approach.....                | 1  |
| 3. Temporal distribution of published researches..... | 2  |
| 4. Reviewed articles.....                             | 3  |
| 5. Full details of vote counting .....                | 9  |
| References .....                                      | 11 |

---

\* Corresponding author. Griffith School of Engineering and Built Environment, Gold Coast Campus, Griffith University, Parklands Drive, Southport, QLD 4222, Australia. *E-mail addresses:* [Mohammad.alipour@griffithuni.edu.au](mailto:Mohammad.alipour@griffithuni.edu.au) (M. Alipour).

## 1. Search keywords

Table 1 lists a total number of 46 applied keywords and how the search was performed in Web of Science and Scopus in three categories (household, behaviour, and solar).

Table 1. Keywords categorized into three categories.

| Area      | Keywords                                                                                                                                                                                                                                                                                                                                 | Search scope                       |     |
|-----------|------------------------------------------------------------------------------------------------------------------------------------------------------------------------------------------------------------------------------------------------------------------------------------------------------------------------------------------|------------------------------------|-----|
| Household | House* OR home* OR resident* OR dwelling* OR domestic OR public OR social OR Users OR Consumer OR agent* OR Regional OR citizen OR person*                                                                                                                                                                                               | Topic                              | AND |
| Behaviour | Adopt* OR diffusion OR behavio* OR knowledge OR uptake OR "take up" OR intention OR attitude* OR aware* OR willingness OR acceptance OR knowledge OR risks OR values OR motiv* OR promotion OR install OR distribut* OR choice OR purchas* OR interest OR perception OR tendency OR incentive OR perspective OR perception OR preference | Topic<br>(title-abstract-keywords) | AND |
| Solar     | Microgeneration* OR "Solar hot water" OR "solar thermal heating" OR "solar thermal hot water" OR "solar heating water" OR "solar water heat"                                                                                                                                                                                             | Topic                              | AND |

Note that, in Table 1, the applied keywords resulted in some papers that hinted only renewable energy and microgeneration technologies in the title, but their focus was either on solar water heater (SWH), at least a section was devoted to SWH, or it was discussed as the main system at home solar systems. As stated in the paper, broader topics were considered if they discuss the residential adoption of solar technology systems. This was captured in the last two rows of the table, to first include all these papers, and second, to avoid irrelevant studies. The search was not limited to a certain period of time.

## 2. Four-phase assessment approach

A four-phase assessment approach [1, 2] was employed to facilitate the screening and eligibility evaluation (Fig. 1). The title, keywords, abstract, and full text of the remained articles from the first screening step was investigated. If the article passed these four steps and was not delete, it was deemed relevant to the scope.

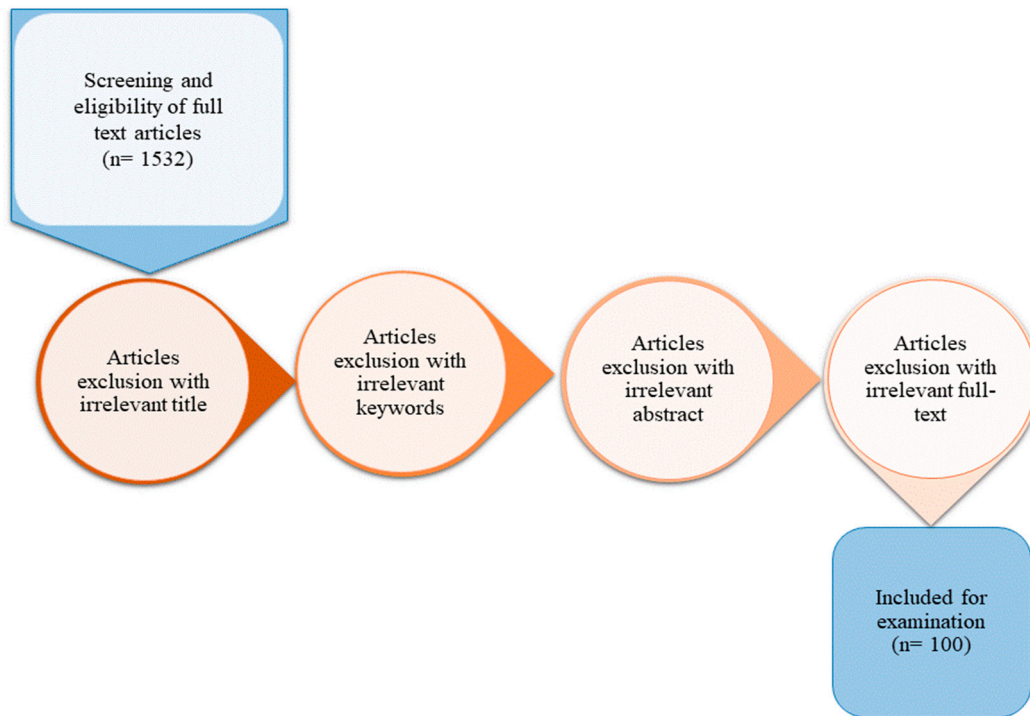

Fig. 1. Four-phase assessment approach. Darker colour = includes more articles.

### 3. Temporal distribution of published researches

The time series of 100 published research in residential SWH acceptance is illustrated in Fig. 2.

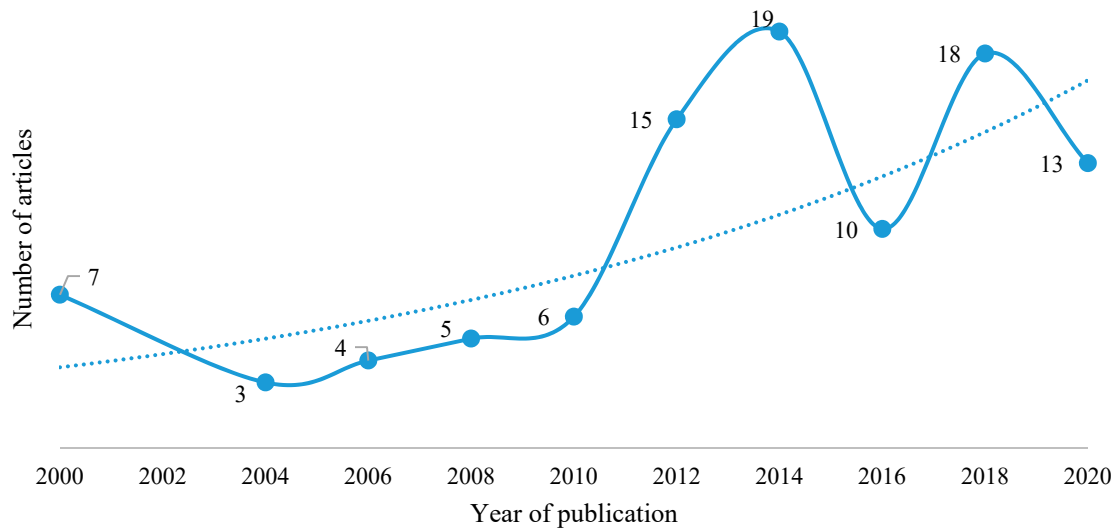

Fig. 2. Temporal distribution of reviewed articles focused on residential SWH adoption.\* Papers for 2020 are restricted to the period (7 January 2021) that the research is conducted.

#### 4. Reviewed articles

Table 2 illustrates information of all 100 articles reviewed in research, including the year of publishing, title and author(s) of the article and the source of publication.

Table 2. Entire list of articles reviewed on the adoption behavior of residential SWH systems.

| No. | Year | Title                                                                                                                                    | Author(s)                           | Source                                     |
|-----|------|------------------------------------------------------------------------------------------------------------------------------------------|-------------------------------------|--------------------------------------------|
| 1   | 1978 | Speeding solar energy commercialization: A Delphi research of marketplace factors                                                        | Cesta & Decker                      | Journal of Business Research               |
| 2   | 1981 | Exploring the Consumer Decision Process in the Adoption of Solar Energy Systems                                                          | Duncan G. Labay & Thomas C. Kinnear | Journal of Consumer Research               |
| 3   | 1983 | Consumer Response to Information that Presents a Range of Possible Performance Levels for a New Product: The Case of Solar Water Heaters | Scott A. Neslin & Gert Assmus       | The Journal Of Consumer Affairs            |
| 4   | 1985 | Incentives For Solar Water Heating Systems                                                                                               | E. Tasdemiroglu                     | Energy                                     |
| 5   | 1993 | Solar Water Heating In Queensland: The Roles Of Innovation Attributes, Attitudes And Information In The Adoption Process!                | John Foster                         | Prometheus: Critical Studies in Innovation |
| 6   | 1998 | The technical and behavioural potential for solar energy - A case study for the town of Lusk/Ireland                                     | Berger                              | Renewable Energy                           |
| 7   | 2000 | Consumer Concern, Knowledge, Belief, and Attitude toward Renewable Energy: An Application of the Reasoned Action Theory                  | Bang, H.K. et al                    | Psychology & Marketing                     |
| 8   | 2004 | Renewable energy policies in Italy                                                                                                       | Ugo Farinelli                       | Energy for Sustainable Development         |
| 9   | 2004 | Solar systems diffusion in local markets                                                                                                 | D.K. Sidiras, E.G. Koukios          | Energy Policy                              |
| 10  | 2004 | Diffusion of renewable energy technologies—barriers and stakeholders' perspectives                                                       | Sudhakar Reddy & J.P. Painuly       | Renewable Energy                           |
| 11  | 2005 | Solar water heaters in Taiwan                                                                                                            | Chang, K.Ch., et al                 | Renewable Energy                           |
| 12  | 2005 | Effect of financial and fiscal incentives on the effective capital cost of solar energy technologies to the user                         | Chandrasekar, B. et al              | Solar Energy                               |
| 13  | 2006 | Consumer attitudes towards domestic solar power systems                                                                                  | Adam Faiers, Charles Neame          | Energy Policy                              |
| 14  | 2006 | Solar water heating in Lebanon: Current status and future prospects                                                                      | Ahmad Hourri                        | Renewable Energy                           |
| 15  | 2007 | Social acceptance of renewable energy innovations: The role of technology cooperation in urban Mexico                                    | Alexandra Mallett                   | Energy Policy                              |

|    |      |                                                                                                                                                                                       |                                          |                                                      |
|----|------|---------------------------------------------------------------------------------------------------------------------------------------------------------------------------------------|------------------------------------------|------------------------------------------------------|
| 16 | 2007 | An opinion survey based assessment of renewable energy technology development in India                                                                                                | B. Chandrasekar & Tara. C. Kandpal       | Renewable and Sustainable Energy Reviews             |
| 17 | 2007 | Household Solar Water Heating System Investment Modelling and Risk Analysis                                                                                                           | Lugarić, L. et al                        | The International Conference on “Computer as a Tool” |
| 18 | 2008 | Improving the energy performance of UK households: Results from surveys of consumer adoption and use of low- and zero-carbon technologies                                             | Sally Caird & Robin Roy & Horace Herring | Energy Efficiency                                    |
| 19 | 2008 | Outlook for solar water heaters in Taiwan                                                                                                                                             | Chang, K.Ch., et al                      | Energy Policy                                        |
| 20 | 2009 | Profits or preferences? Assessing the adoption of residential solar thermal technologies                                                                                              | B.F.Mills,J.Schleich                     | Energy Policy                                        |
| 21 | 2010 | Willingness-to-pay for renewable energy: Primary and discretionary choice of British households' for micro-generation technologies                                                    | Scarpa & Willis                          | Energy Economics                                     |
| 22 | 2010 | Testing Residential Solar Thermal Adoption                                                                                                                                            | Chelsea Schelly                          | Environment and Behavior                             |
| 23 | 2010 | Adoption and Use of Household Microgeneration Heat Technologies                                                                                                                       | Sally Caird, Robin Roy                   | Low Carbon Economy                                   |
| 24 | 2010 | Assessment of public acceptance and willingness to pay for renewable energy sources in Crete                                                                                          | N. Zografakis et al.                     | Renewable and Sustainable Energy Reviews             |
| 25 | 2010 | Consumer awareness in the adoption of microgeneration technologies: an empirical investigation in the Republic of Ireland                                                             | Claudy et al.                            | Renewable and Sustainable Energy Reviews             |
| 26 | 2011 | Prediction of photovoltaic and solar water heater diffusion and evaluation of promotion policies on the basis of consumers' choices                                                   | Yamaguchi et al.                         | Applied energy                                       |
| 27 | 2011 | Will non-owners follow pioneer consumers in the adoption of solar thermal systems? Empirical evidence for northwestern Germany                                                        | J.S. Woersdorfer & W. Kaus               | Ecological Economics                                 |
| 28 | 2011 | Selection of renewable energy technologies for a developing county: A case of Pakistan                                                                                                | Muhammad Amer, Tugrul U. Daim            | Energy for Sustainable Development                   |
| 29 | 2011 | Social acceptance of solar energy technologies in China—End users’ perspective                                                                                                        | Yuan, X. et al                           | Energy Policy                                        |
| 30 | 2011 | Renewable energy adoption in an ageing population: Heterogeneity in preferences for microgeneration technology adoption                                                               | Willis.,K. et al                         | Energy Policy                                        |
| 31 | 2011 | The diffusion of microgeneration technologies – assessing the influence of perceived product characteristics on home owners' willingness to pay                                       | Claudy et al.                            | Energy Policy                                        |
| 32 | 2011 | Residential Property Development Professionals Attitudes Towards Sustainable Development In Australia                                                                                 | S. G. Bond                               | Int. J. Sus. Dev. Plann.                             |
| 33 | 2011 | Dissemination of solar water heaters in South Africa                                                                                                                                  | Chang, K.Ch., et al                      | Journal of Energy in Southern Africa                 |
| 34 | 2012 | Financial measures Serbia should offer for solar water heating systems                                                                                                                | Sanja Stevanović & Mila Pucar            | Energy and Buildings                                 |
| 35 | 2012 | Can premium tariffs for micro-generation and small scale renewable heat help the fuel poor, and if so, how? Case studies of innovative finance for community energy schemes in the UK | Saunders, R.W. et al                     | Energy Policy                                        |

|    |      |                                                                                                                                   |                                                    |                                                                        |
|----|------|-----------------------------------------------------------------------------------------------------------------------------------|----------------------------------------------------|------------------------------------------------------------------------|
| 36 | 2012 | Adoption of technology by the low-income population segment: The low-cost hot water heater case                                   | Marina S. de Oliveira Ilha, Marília Ferraz Ribeiro | Habitat International                                                  |
| 37 | 2012 | Economic and environmental analysis of solar water heater utilisation in Gauteng Province, South Africa                           | Özdemir, E.D. et al                                | Journal of Energy in Southern Africa                                   |
| 38 | 2012 | Why is renewable heat in the UK underperforming? A socio-technical perspective                                                    | Noam Bergman                                       | Proc IMechE Part A: J Power and Energy                                 |
| 39 | 2012 | Policy pitfalls of SWH                                                                                                            | Ernst Uken                                         | SHC 2012                                                               |
| 40 | 2012 | Evaluating intervention options to achieve environmental benefits in the residential sector                                       | Andrew Higgins • Greg Foliente                     | Sustainability Science                                                 |
| 41 | 2013 | Study of Consumer's Willingness to Use Solar Water Heaters in DSM Program                                                         | Sangamesh G. Sakri, G. V. Jayaramaiah              | 7th International Power Engineering and Optimization Conference        |
| 42 | 2013 | Rural public acceptance of renewable energy deployment: The case of Shandong in China                                             | Liu,W. et al                                       | Applied Energy                                                         |
| 43 | 2013 | Farmers' willingness to convert traditional houses to solar houses in rural areas: A survey of 465 households in Chongqing, China | Li et al.                                          | Energy policy                                                          |
| 44 | 2013 | Assessment of government support for the household adoption of micro-generation systems in Korea                                  | Gicheol Jeong                                      | Energy Policy                                                          |
| 45 | 2013 | Solar thermal market in Taiwan                                                                                                    | Chang, K.Ch., et al                                | Energy Policy                                                          |
| 46 | 2013 | A public perspective on the adoption of microgeneration technologies in New Zealand: A multivariate probit approach               | Baskaran, R. et al                                 | Energy Policy                                                          |
| 47 | 2013 | Motivational factors influencing the homeowners' decisions between residential heating systems: An empirical analysis for Germany | C.C. Michelsen, R., Madlener                       | Energy Policy                                                          |
| 48 | 2013 | Analysis of social acceptance of rural Solar Water Heater projects in South Africa                                                | Geoffrey Mukwada                                   | International Conference on Renewable Energy Research and Applications |
| 49 | 2013 | Which factors affect the willingness of consumers to adopt renewable energies?                                                    | Sardianou & Genoudi                                | Renewable energy                                                       |
| 50 | 2013 | Residential energy efficient device adoption in South Africa                                                                      | Blommestein, K., et al                             | Sustainable Energy Technologies and Assessments                        |
| 51 | 2014 | Investigating the importance of motivations and barriers related to microgeneration uptake in the UK                              | Balcombe et al.                                    | Applied Energy                                                         |
| 52 | 2014 | Diffusion of solar water heaters in regional China: Economic feasibility and policy effectiveness evaluation                      | Ma, B. et al                                       | Energy Policy                                                          |
| 53 | 2014 | Solar heating in Taiwan                                                                                                           | Chang, K.Ch., et al                                | 2013 ISES Solar World Congress                                         |
| 54 | 2014 | Pathways toward whole community transformation: a case study on the role of school engagement and environmental education         | Mitchell, K.I. et al                               | Environ Dev Sustain                                                    |

|    |      |                                                                                                                                                                                  |                                    |                                                                                                    |
|----|------|----------------------------------------------------------------------------------------------------------------------------------------------------------------------------------|------------------------------------|----------------------------------------------------------------------------------------------------|
| 55 | 2014 | Cleaning the energy sources for water heating among Nanjing households: barriers and opportunities for solar and natural gas                                                     | Lingyun ZHU et al                  | Front. Environ. Sci. Eng.                                                                          |
| 56 | 2014 | Towards a UTAUT-Based Model for the Intention to use Solar Water Heaters by Libyan Households                                                                                    | M. Saleh, A. et al                 | International Journal of Energy Economics and Policy                                               |
| 57 | 2014 | Why Social Acceptance in South African Solar Water Heater Projects Should Shape National Energy Policy: The Case of Bluegumbosch                                                 | Mukwada,G. et al                   | Mediterranean Journal of Social Sciences                                                           |
| 58 | 2014 | Do incentives work?: An analysis of residential solar energy adoption in Miami-Dade County, Florida                                                                              | Varela-Margolles & Onsted          | Southeastern Geographer                                                                            |
| 59 | 2014 | Identification of the barriers for the slow uptake of solar water heaters in Australia                                                                                           | Djordjevic, S. et al               | The 52nd Annual Conference of the Australian Solar Council                                         |
| 60 | 2015 | Household preferences for energy saving measures: Approach of discrete choice models                                                                                             | JRID, O., et al                    | Energy and Buildings                                                                               |
| 61 | 2015 | Enhancing public acceptance of renewable heat obligation policies in South Korea: Consumer preferences and policy implications                                                   | Lim, S. et al                      | Energy Economics                                                                                   |
| 62 | 2015 | The emperor and the cowboys: The role of government policy and industry in the adoption of domestic solar microgeneration systems                                                | Genevieve Simpson & Julian Clifton | Energy policy                                                                                      |
| 63 | 2015 | “Let’ s do it ourselves” Individual motivations for investing in renewables at community level                                                                                   | Dóci & Vasileiadou                 | Renewable and sustainable energy reviews                                                           |
| 64 | 2015 | Consumer attitudes towards renewable energy in China—The case of Shanghai                                                                                                        | Hast, A. et al                     | Sustainable Cities and Society                                                                     |
| 65 | 2015 | An exploratory of residents’ views towards applying renewable energy systems in Saudi dwellings                                                                                  | Farajallah Alrashed, Muhammad Asif | The 7th International Conference on Applied Energy                                                 |
| 66 | 2016 | Who wants solar water heaters and alternative fuel vehicles? Assessing social–psychological predictors of adoption intention and policy support in China                         | Chen, C. et al                     | Energy Research & Social Science                                                                   |
| 67 | 2016 | Humanitarian engineering opportunities and challenges in rural Dominican Republic: A case study of El Cercado                                                                    | Blair, S., et al                   | GHTC 2016 - IEEE Global Humanitarian Technology Conference: Technology for the Benefit of Humanity |
| 68 | 2016 | Household Income Structure and Electrical Appliance Ownership: Evidence from Japanese National Household Survey                                                                  | Shigeru Matsumoto                  | International Journal of Energy Economics and Policy,                                              |
| 69 | 2016 | Installation of Residential Energy Systems: Local Conditions and Residents' Willingness                                                                                          | Kazuhiro Yuasa and Mai Yata        | Journal of Asian Architecture and Building Engineering                                             |
| 70 | 2017 | Development of Customized Formulae for Feasibility and Break-Even Analysis of Domestic Solar Water Heater                                                                        | Rout. A. et al                     | International Journal Of Renewable Energy Research                                                 |
| 71 | 2017 | Assessment of Solar Water Heating In Cyprus: Utility, Development and Policy                                                                                                     | Bamisile, O. et al                 | International Journal Of Renewable Energy Research                                                 |
| 72 | 2017 | Solar energy adoption in rural China: A sequential decision approach                                                                                                             | Wang, X. e al.                     | Journal of Cleaner Production                                                                      |
| 73 | 2017 | Consumer renewable energy technology adoption decision-making; Comparing models on perceived attributes and attitudinal constructs in the case of solar water heaters in Lebanon | Elmustapha, h. et al               | Journal of Cleaner Production                                                                      |

|    |      |                                                                                                                                                                             |                                                |                                                                               |
|----|------|-----------------------------------------------------------------------------------------------------------------------------------------------------------------------------|------------------------------------------------|-------------------------------------------------------------------------------|
| 74 | 2017 | The 'Reduce and Save' Project: An Island- Wide Resource Management Awareness Initiative                                                                                     | Refalo, p. et al                               | Mediterranean Green Buildings & Renewable Energy                              |
| 75 | 2017 | Financial attractiveness of decentralized renewable energy systems e A case of the central Himalayan state of Uttarakhand in India                                          | Yaqoot, M. et al                               | Renewable Energy                                                              |
| 76 | 2018 | The Economics of Residential Solar Water Heaters in Emerging Economies: The Case of Turkey                                                                                  | Aydin, E. et al                                | Energy Economics                                                              |
| 77 | 2018 | Green transition of energy systems in rural China: National survey evidence of households' discrete choices on water heaters                                                | Ma, B. et al                                   | Energy Policy                                                                 |
| 78 | 2018 | Social ties, homophily and heterophily in urban sustainability transitions: User practices and solar water heater diffusion in China                                        | Zhen Yu and David Gibbs                        | Energy Research & Social Science                                              |
| 79 | 2018 | Potential of renewable energy system utilisation at decentralised level in the state of Uttarakhand in India                                                                | Mohammed Yaqoot & Tara C. Kandpal              | International Journal of Ambient Energy                                       |
| 80 | 2018 | An Agent-Based Model of Residential Energy Efficiency Adoption                                                                                                              | Moglia, M. et al                               | Journal of Artificial Societies and Social Simulation                         |
| 81 | 2018 | Valuating renewable microgeneration technologies in Lithuanian households: A study on willingness to pay                                                                    | Su. W. et al                                   | Journal of Cleaner Production                                                 |
| 82 | 2018 | How Households Adopt Sustainable Innovations? A Free Decision Enforced by Others                                                                                            | Ingo Kastner and Sebastian Bobeth              | Journal of Energy                                                             |
| 83 | 2018 | Measuring public acceptance of climate-friendly technologies based on creativity and cognitive approaches: Practical guidelines for reforming risky energy policies in Iran | Fetanat, A. et al                              | Renewable Energy                                                              |
| 84 | 2018 | Public Perceptions and Willingness to Pay for Renewable Energy: A Case Study from Greece                                                                                    | Ntanos, S. et al                               | sustainability                                                                |
| 85 | 2018 | A lesson learned from the long-term subsidy program for solar water heaters in Taiwan                                                                                       | Chang, K.Ch., et al                            | Sustainable Cities and Society                                                |
| 86 | 2018 | Solar water heaters uptake in Australia – Issues and barriers                                                                                                               | Urmee., T. et al                               | Sustainable Energy Technologies and Assessments                               |
| 87 | 2018 | Effectiveness and Prospects of Implementing a Solar Water Heating System in Astana, Kazakhstan                                                                              | Absemetov, A. et al                            | The Role of Exergy in Energy and the Environment. Green Energy and Technology |
| 88 | 2019 | The Impact of Subsidy Programs for Solar Thermal Applications: A Case Study for a Remote Island                                                                             | Lin, W. et al                                  | energies                                                                      |
| 89 | 2019 | Factors affecting Sustainable Market Acceptance of Residential Microgeneration Technologies. A Two Time Period Comparative Analysis                                         | Karytsas, S. et al                             | energies                                                                      |
| 90 | 2019 | Drivers of renewable technology adoption in the household sector                                                                                                            | Jacksohn, A. et al                             | Energy Economics                                                              |
| 91 | 2019 | Social psychological predictors of adoption intention for solar water heaters in rural China                                                                                | Wang, X. e al.                                 | Social Behavior and Personality                                               |
| 92 | 2019 | Barriers and solutions of solar water heaters in Mexican household                                                                                                          | L. Salgado-Conradoa and Areli Lopez-Montelongo | Solar Energy                                                                  |
| 93 | 2019 | Forecasting of advertising effectiveness for renewable energy technologies: A neural network analysis                                                                       | Sharifi, M. et al                              | Technological Forecasting & Social Change                                     |



|     |      |                                                                                                                                  |                            |                                          |
|-----|------|----------------------------------------------------------------------------------------------------------------------------------|----------------------------|------------------------------------------|
| 94  | 2020 | Market diffusion of household PV systems: Insights using the Bass model and solar water heaters market data                      | Batista da Silva, H. et al | Energy for Sustainable Development       |
| 95  | 2020 | Problems of engineering entrepreneurship in Africa: A design optimization example in solar thermal engineering                   | Kanyarusoke, K.            | Engineering Science and Technology       |
| 96  | 2020 | The socio-economic impacts of solar water heaters compared across two communities: A case study of Cato Manor                    | Naidoo, A.                 | Renewable and Sustainable Energy Reviews |
| 97  | 2020 | Solar water heating technical-economic potential in the household sector in Brazil                                               | Cruz, T. et al             | Renewable Energy                         |
| 98  | 2020 | A structural equation modeling analysis of factors driving customer purchase intention towards solar water heater                | Kumar, V. et al            | Smart and Sustainable Built Environment  |
| 99  | 2021 | Towards carbon free economy and electricity: The puzzle of energy costs, sustainability and security based on willingness to pay | Balezentis, T. et al       | Energy                                   |
| 100 | 2021 | Public perception and adoption of Solar Water Heating systems in Chile: The role of supply side income tax credits               | Nasirov, S. et al          | Renewable and Sustainable Energy Reviews |

## 5. Full details of vote counting

The following Table 3 and Table 4 provide the outcome of the vote counting technique on the economic and technical predictors, respectively. Of the full 123 predictors identified in this study, those 99 predictors that were tested in the vote-counting exercises are listed.

Table 3. Full lists of votes on the Economic determinants of residential SWHs.

| Category                                     | Subcategory           | Predictors (n=50)                                          | Positive |         | Negative |         | No. of Study voted | % of Sig. |
|----------------------------------------------|-----------------------|------------------------------------------------------------|----------|---------|----------|---------|--------------------|-----------|
|                                              |                       |                                                            | Sig.     | Nonsig. | Sig.     | Nonsig. |                    |           |
| Financial knowledge                          |                       | System cost                                                | 4        | 0       | 6        | 2       | 12                 | 83%       |
|                                              |                       | Upfront cost                                               | 0        | 0       | 4        | 3       | 7                  | 57%       |
|                                              |                       | Installation cost                                          | 1        | 0       | 6        | 0       | 7                  | 100%      |
|                                              |                       | Fossil fuel cost                                           | 3        | 1       | 2        | 0       | 6                  | 83%       |
|                                              |                       | Energy cost                                                | 0        | 0       | 5        | 0       | 5                  | 100%      |
|                                              |                       | Bill saving                                                | 2        | 2       | 0        | 0       | 4                  | 50%       |
|                                              |                       | Affordability                                              | 2        | 0       | 1        | 1       | 4                  | 75%       |
|                                              |                       | O&M cost                                                   | 1        | 1       | 2        | 0       | 4                  | 75%       |
|                                              |                       | Energy saving                                              | 3        | 0       | 0        | 0       | 3                  | 100%      |
|                                              |                       | Utility rebates or incentives                              | 1        | 0       | 1        | 0       | 2                  | 100%      |
|                                              |                       | Electricity price                                          | 1        | 0       | 1        | 0       | 2                  | 100%      |
|                                              |                       | Revenue                                                    | 1        | 0       | 0        | 0       | 1                  | 100%      |
|                                              |                       | Energy rationing                                           | 0        | 0       | 1        | 0       | 1                  | 100%      |
|                                              |                       | Financial support for other sources                        | 0        | 0       | 1        | 0       | 1                  | 100%      |
|                                              |                       | Loan                                                       | 1        | 0       | 0        | 0       | 1                  | 100%      |
|                                              |                       | Switching cost                                             | 0        | 0       | 1        | 0       | 1                  | 100%      |
|                                              |                       | System cost per Watt                                       | 0        | 0       | 1        | 0       | 1                  | 100%      |
|                                              |                       | permissions & insurance                                    | 1        | 0       | 0        | 0       | 1                  | 100%      |
|                                              | Financial metrics     | Payback period                                             | 3        | 3       | 1        | 0       | 7                  | 57%       |
|                                              |                       | Benefit-Cost Ratio                                         | 0        | 1       | 0        | 1       | 2                  | 0%        |
|                                              |                       | NPV                                                        | 0        | 1       | 0        | 0       | 1                  | 0%        |
|                                              |                       | IRR                                                        | 0        | 1       | 0        | 0       | 1                  | 0%        |
|                                              | Government incentives | Financial incentives reducing purchase or installing costs | 21       | 9       | 0        | 1       | 31                 | 68%       |
|                                              |                       | Financial incentives reducing RoI by FiT                   | 3        | 0       | 0        | 0       | 3                  | 100%      |
| Perceived attitude towards financial aspects |                       | Perceived attitude of government policies and incentives   | 16       | 3       | 3        | 2       | 24                 | 79%       |
|                                              |                       | Perceived system price                                     | 1        | 0       | 10       | 0       | 11                 | 100%      |
|                                              |                       | Perceived bill saving                                      | 7        | 1       | 0        | 0       | 8                  | 88%       |
|                                              |                       | Perceived maintenance cost                                 | 0        | 1       | 4        | 2       | 7                  | 57%       |
|                                              |                       | Perceived benefit                                          | 4        | 3       | 0        | 0       | 7                  | 57%       |
|                                              |                       | Perceived energy price                                     | 2        | 0       | 4        | 0       | 6                  | 100%      |

|                            |                                                                |   |   |   |   |   |      |
|----------------------------|----------------------------------------------------------------|---|---|---|---|---|------|
|                            | Perceived energy saving                                        | 6 | 0 | 0 | 0 | 6 | 100% |
|                            | Perceived upfront cost                                         | 0 | 0 | 5 | 1 | 6 | 83%  |
|                            | Perceived costs                                                | 1 | 0 | 4 | 1 | 6 | 83%  |
|                            | Perceived payback period                                       | 1 | 0 | 4 | 0 | 5 | 100% |
|                            | Perceived affordability                                        | 1 | 1 | 2 | 1 | 5 | 60%  |
|                            | Perceived electricity price/ cost                              | 3 | 0 | 1 | 0 | 4 | 100% |
|                            | Financial motivation                                           | 1 | 2 | 0 | 0 | 3 | 33%  |
|                            | Economical Obstacles                                           | 0 | 1 | 2 | 0 | 3 | 67%  |
|                            | Increasing home value                                          | 1 | 2 | 0 | 0 | 3 | 33%  |
|                            | Perceived installation costs                                   | 0 | 0 | 3 | 0 | 3 | 100% |
|                            | Willingness to pay more                                        | 1 | 0 | 1 | 0 | 2 | 100% |
|                            | Investment opportunity                                         | 0 | 1 | 0 | 1 | 2 | 0%   |
|                            | Obtaining best possible price                                  | 0 | 0 | 0 | 1 | 1 | 0%   |
|                            | Perceived fossil fuel price                                    | 1 | 0 | 0 | 0 | 1 | 100% |
|                            | market conditions                                              | 0 | 1 | 0 | 0 | 1 | 0%   |
|                            | Perceived switching cost                                       | 0 | 0 | 1 | 0 | 1 | 100% |
| Common financial knowledge | Knowledge of incentives                                        | 2 | 0 | 0 | 0 | 2 | 100% |
|                            | Knowledge of net-billing                                       | 1 | 0 | 0 | 0 | 1 | 100% |
|                            | Knowledge of financial metrics used for calculating investment | 0 | 1 | 0 | 0 | 1 | 0%   |
|                            | Security of investment                                         | 1 | 0 | 0 | 0 | 1 | 100% |

Table 4. Full lists of votes on the technical determinants of residential SWH.

| Category                                     | Subcategory | Predictors (n=49)                                      | Positive |         | Negative |         | No. of Study Voted | % of Sig. |
|----------------------------------------------|-------------|--------------------------------------------------------|----------|---------|----------|---------|--------------------|-----------|
|                                              |             |                                                        | Sig.     | Nonsig. | Sig.     | Nonsig. |                    |           |
| Common technical knowledge                   |             | Knowledge (awareness) of SWH systems                   | 6        | 2       | 4        | 0       | 12                 | 83%       |
|                                              |             | knowledge on renewable energy                          | 4        | 3       | 0        | 0       | 7                  | 57%       |
|                                              |             | Knowledge of pros and cons of SWH                      | 1        | 1       | 3        | 0       | 5                  | 80%       |
|                                              |             | Knowledge of installation and maintenance              | 1        | 1       | 0        | 0       | 2                  | 50%       |
|                                              |             | Knowledge of presence of solar energy service provider | 0        | 0       | 1        | 0       | 1                  | 100%      |
|                                              |             | Availability of technical support                      | 1        | 0       | 0        | 0       | 1                  | 100%      |
|                                              |             | Knowledge of operation                                 | 0        | 0       | 1        | 0       | 1                  | 100%      |
| Technical knowledge                          |             | Efficiency of SWH                                      | 3        | 0       | 2        | 0       | 5                  | 100%      |
|                                              |             | SWH lifespan                                           | 2        | 0       | 0        | 0       | 2                  | 100%      |
|                                              |             | Technical risk and services                            | 0        | 0       | 2        | 0       | 2                  | 100%      |
|                                              |             | plumbing systems                                       | 0        | 0       | 1        | 0       | 1                  | 100%      |
|                                              |             | Solar collector                                        | 1        | 0       | 0        | 0       | 1                  | 100%      |
|                                              |             | Warranty and Garranty                                  | 1        | 0       | 0        | 0       | 1                  | 100%      |
| Perceived attitude towards technical aspects |             | Lack of knowledge                                      | 0        | 1       | 7        | 1       | 9                  | 78%       |
|                                              |             | Perceived maturity of local market                     | 1        | 1       | 2        | 1       | 5                  | 60%       |

|                          |                                |                                               |   |   |   |   |    |      |
|--------------------------|--------------------------------|-----------------------------------------------|---|---|---|---|----|------|
|                          |                                | Quality of solar installations and installers | 0 | 1 | 2 | 1 | 4  | 50%  |
|                          |                                | Complexity                                    | 1 | 1 | 2 | 0 | 4  | 75%  |
|                          |                                | Technical support and customer service        | 1 | 0 | 1 | 1 | 3  | 67%  |
|                          |                                | Perceived complexity of information           | 0 | 0 | 1 | 0 | 1  | 100% |
|                          | Perceived features of SWH      | Perceived reliability                         | 2 | 0 | 2 | 2 | 6  | 67%  |
|                          |                                | Perceived efficiency                          | 1 | 4 | 0 | 0 | 5  | 20%  |
|                          |                                | Perceived Installation and operation          | 1 | 0 | 3 | 1 | 5  | 80%  |
|                          |                                | Perceived appearance of SWH                   | 0 | 0 | 0 | 5 | 5  | 0%   |
|                          |                                | Perceived warranty and guarantee              | 2 | 1 | 1 | 0 | 4  | 75%  |
|                          |                                | Equipment and storage space                   | 0 | 0 | 1 | 2 | 3  | 33%  |
|                          |                                | Perceived Ease of use                         | 1 | 0 | 1 | 1 | 3  | 67%  |
|                          |                                | Perceived maintenance concerns                | 1 | 0 | 1 | 1 | 3  | 67%  |
|                          |                                | Perceived Accessibility                       | 0 | 1 | 1 | 0 | 2  | 50%  |
|                          |                                | Perceived quality                             | 0 | 2 | 0 | 0 | 2  | 0%   |
|                          |                                | Perceived system life                         | 1 | 1 | 0 | 0 | 2  | 50%  |
|                          |                                | Perceived Intermittency                       | 1 | 0 | 0 | 1 | 2  | 50%  |
|                          |                                | Safety                                        | 1 | 0 | 1 | 0 | 2  | 100% |
|                          |                                | Perceived concerns of the structural damages  | 0 | 0 | 2 | 0 | 2  | 100% |
|                          |                                | Perceived durability                          | 0 | 1 | 0 | 0 | 1  | 0%   |
| Dwelling characteristics | Physical features of house     | House type                                    | 9 | 3 | 2 | 0 | 14 | 79%  |
|                          |                                | House size                                    | 4 | 3 | 1 | 0 | 8  | 63%  |
|                          |                                | Roof type                                     | 2 | 0 | 0 | 0 | 2  | 100% |
|                          |                                | Roof insulation                               | 0 | 1 | 0 | 0 | 1  | 0%   |
|                          |                                | Roof quality                                  | 0 | 1 | 0 | 0 | 1  | 0%   |
|                          |                                | Suitability of house                          | 1 | 0 | 0 | 0 | 1  | 100% |
|                          | Non-physical features of house | House ownership                               | 5 | 1 | 0 | 1 | 7  | 71%  |
|                          |                                | Solar radiation                               | 3 | 2 | 0 | 0 | 5  | 60%  |
|                          |                                | Temperature                                   | 3 | 0 | 1 | 0 | 4  | 100% |
|                          |                                | Weather condition                             | 0 | 0 | 3 | 1 | 4  | 75%  |
|                          |                                | Geographical location                         | 2 | 1 | 0 | 1 | 4  | 50%  |
|                          |                                | Sunshine hours                                | 3 | 0 | 0 | 0 | 3  | 100% |
|                          |                                | energy efficiency                             | 1 | 0 | 0 | 0 | 1  | 100% |
|                          |                                | House age                                     | 0 | 0 | 1 | 0 | 1  | 100% |
|                          |                                | Home/ House value                             | 1 | 0 | 0 | 0 | 1  | 100% |

## References

[1] Alipour M, Salim H, Stewart RA, Sahin O. Predictors, taxonomy of predictors, and correlations of predictors with the decision behaviour of residential solar photovoltaics adoption: A review. Renewable and Sustainable Energy Reviews. 2020;123:109749.

[2] Sitepu MH, Matondang AR, Sembiring MT. Sustainability assessment in crude palm oil production: A review. IOP Conference Series: Materials Science and Engineering. 2020;725:012074.
